# Supplementary material for: Microwave-assisted delivery of an anticancer drug to cancer cells
Source: Royal Society of Chemistry journal article supplement (doi:10.1039/c8ra05605f), 2018-01-01
Supplement: c8ra05605f1.pdf [file c8ra05605f1.pdf]

## Supplementary material

### Microwave-assisted delivery of an anticancer drug to cancer cells

Sina Atrin Mazinani,<sup>1,2</sup> Jeffrey A. Stuart,<sup>2,3</sup> Hongbin Yan<sup>1,2\*</sup>

<sup>1</sup>Department of Chemistry, Brock University, 1812 Sir Isaac Brock Way, St. Catharines, Ontario,  
Canada L2S 3A1

<sup>2</sup>Centre for Biotechnology, Brock University, 1812 Sir Isaac Brock Way, St. Catharines, Ontario,  
Canada L2S 3A1

<sup>3</sup>Department of Biological Sciences, Brock University, 1812 Sir Isaac Brock Way, St. Catharines,  
Ontario, Canada L2S 3A1

---

\*Corresponding author. Tel.: +19056885550×3545. E-mail address: [tyan@brocku.ca](mailto:tyan@brocku.ca)

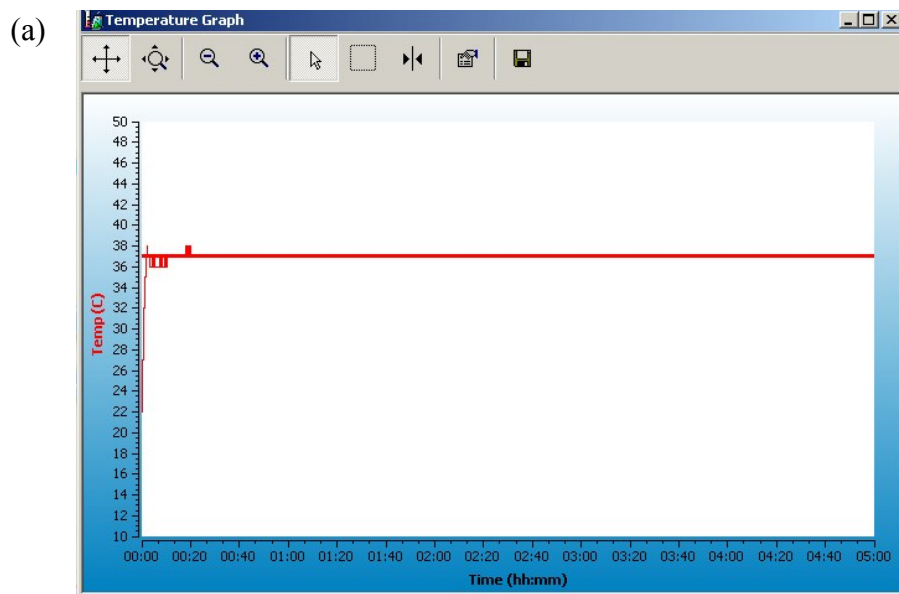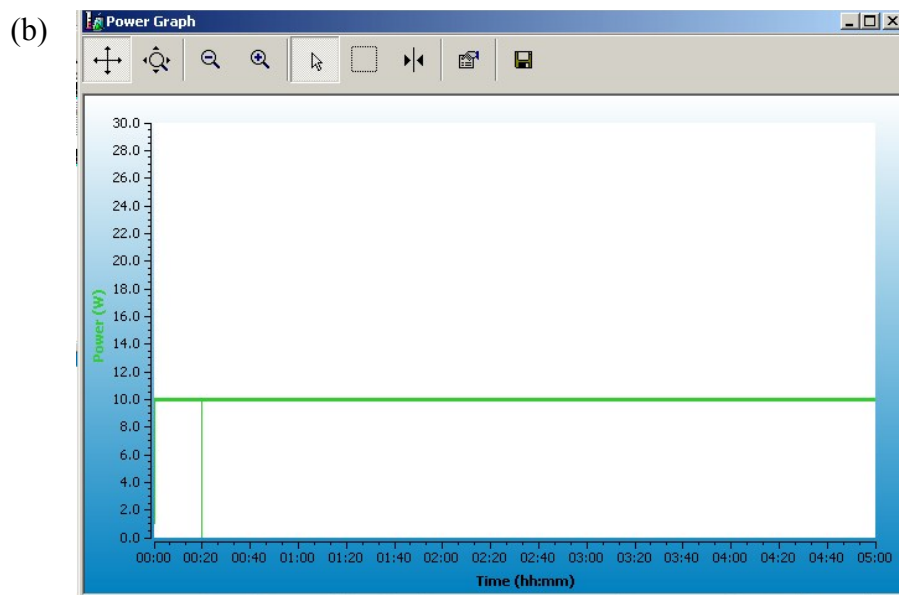

**Figure S1.** (a). Representative temperature and (b) microwave power profiles in the microwave reactor.
